# Supplementary material
Source: PubMed Central journal article supplement (PMC2539107)
Supplement: NIHMS62922-supplement-1File002.pdf [file NIHMS62922-supplement-1File002.pdf]

## Supplementary Data

### The agonist-antagonist dilemma in molecular imaging: Evaluation of a monomolecular multimodal imaging agent for the somatostatin receptor

W. Barry Edwards, Baogang Xu, Walter Akers, Phillip P. Cheney, Kexian Liang, Buck E. Rogers, Carolyn J. Anderson, Samuel Achilefu<sup>†</sup>

#### Table of contents

|                                                             |   |
|-------------------------------------------------------------|---|
| Figure 1 RP-HPLC LS172.....                                 | 2 |
| Figure 2 ES/MS LS172 .....                                  | 3 |
| Figure 3 Radiochromatogram of <sup>64</sup> Cu-LS172 .....  | 4 |
| Figure 4 Radiochromatogram of <sup>177</sup> Lu-LS172 ..... | 5 |
| Figure 5 RP-HPLC <sup>nat</sup> Cu-LS172.....               | 6 |
| Figure 6 ESMS <sup>nat</sup> Cu-LS172.....                  | 6 |
| Figure 7RP-HPLC <sup>nat</sup> Lu-LS172.....                | 7 |
| Figure 8 ESMS <sup>nat</sup> Lu-LS172.....                  | 7 |

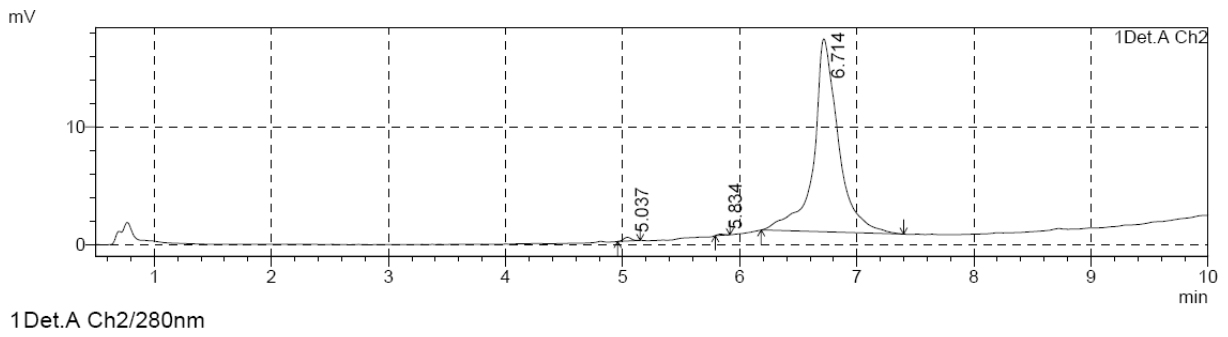

PeakTable

Detector A Ch2 280nm

| Peak# | Ret. Time | Area   | Height | Area %  | Height % |
|-------|-----------|--------|--------|---------|----------|
| 1     | 5.037     | 1450   | 317    | 0.595   | 1.888    |
| 2     | 5.834     | 363    | 97     | 0.149   | 0.577    |
| 3     | 6.714     | 241949 | 16396  | 99.256  | 97.534   |
| Total |           | 243762 | 16811  | 100.000 | 100.000  |

Figure 1 RP-HPLC LS172

Ret. Time: 6.717(Scan#:747)

BG Mode: ?

Mass Peaks: 1128 Base Peak: 723.70(138166) Polarity: Pos Segment1 - Event1

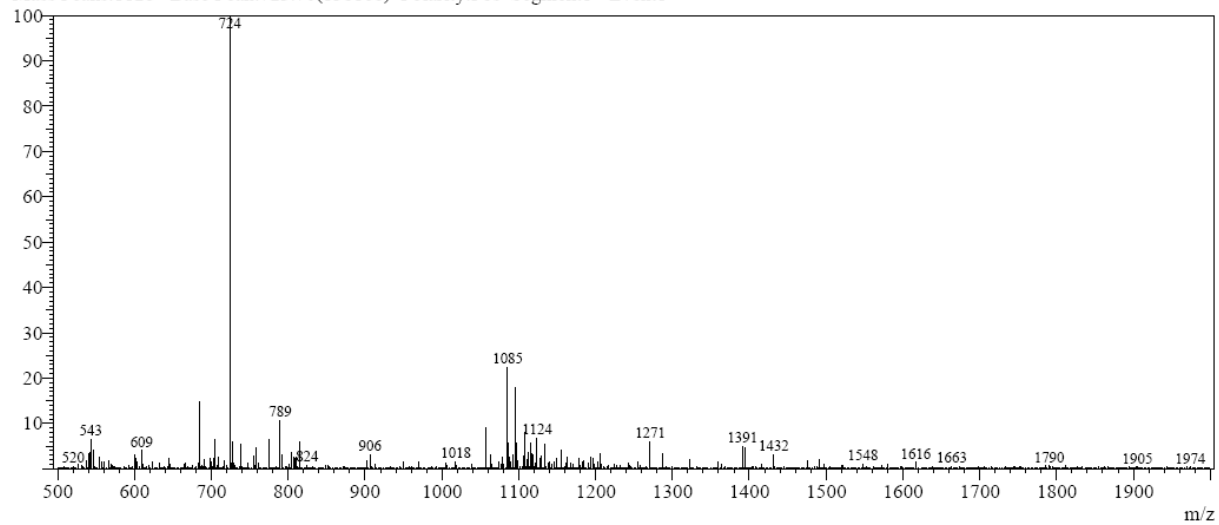

Figure 2 ES/MS LS172

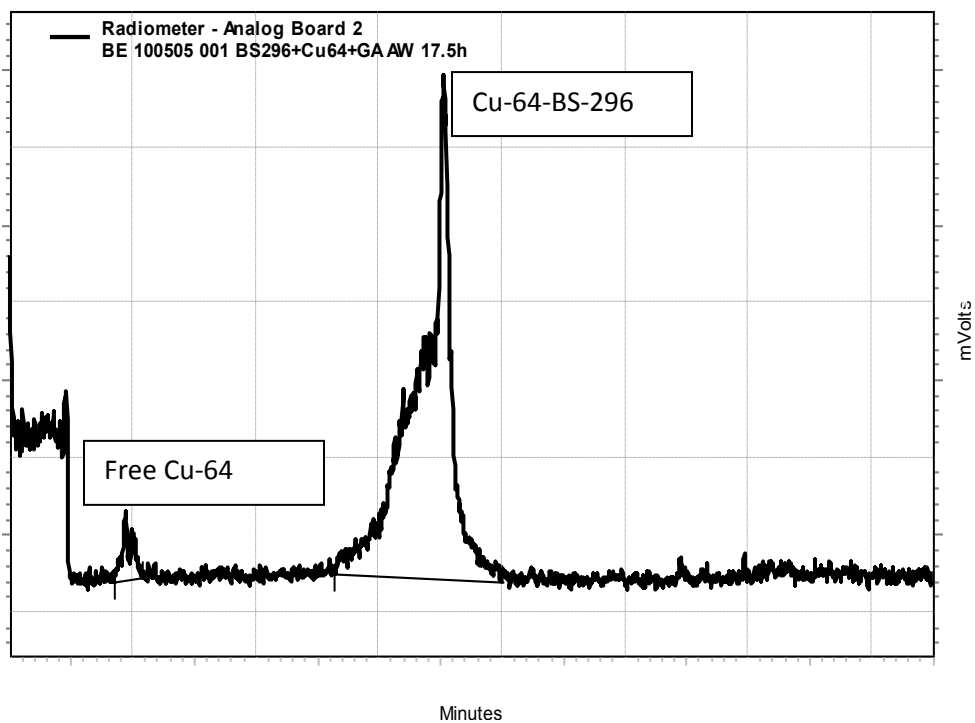

Figure 3 Radiochromatogram of  $^{64}\text{Cu}$ -LS172

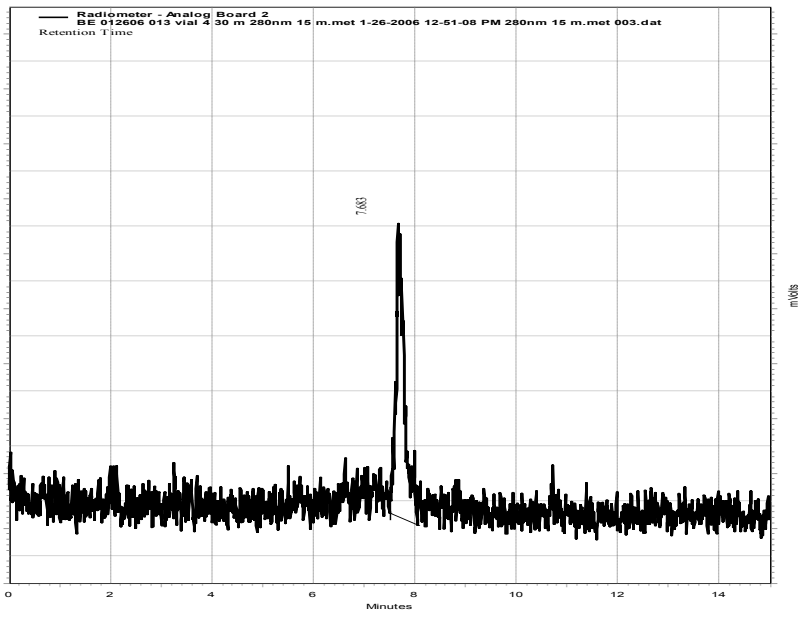

Figure 4 Radiochromatogram of  $^{177}\text{Lu}$ -LS172

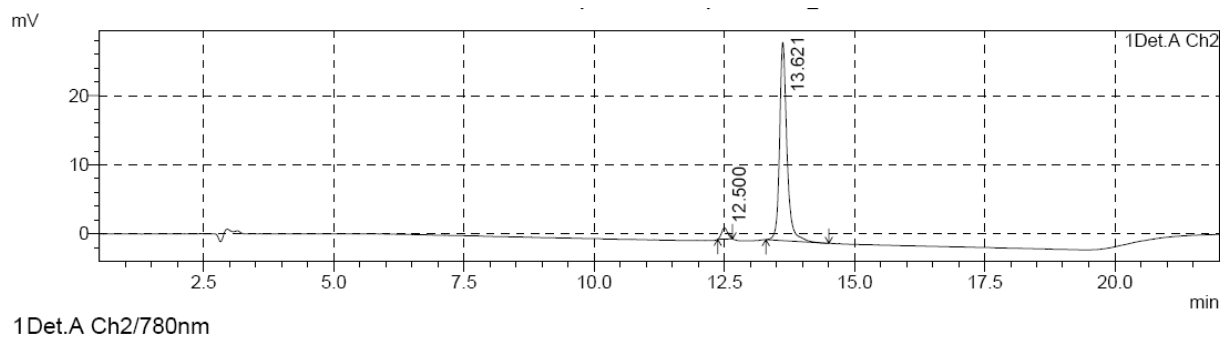

PeakTable

UV-Vis detector Ch2 780nm

| Peak# | Ret. Time | Area   | Height | Area %  | Height % |
|-------|-----------|--------|--------|---------|----------|
| 1     | 12.500    | 13051  | 1614   | 4.435   | 5.330    |
| 2     | 13.621    | 281244 | 28661  | 95.565  | 94.670   |
| Total |           | 294296 | 30275  | 100.000 | 100.000  |

Figure 5 RP-HPLC <sup>nat</sup>Cu-LS172

Ret.Time:13.633(Scan#:1577)  
 BG Mode:?  
 Mass Peaks:18 Base Peak:554.00(7522) Polarity:Pos Segment1 - Event1

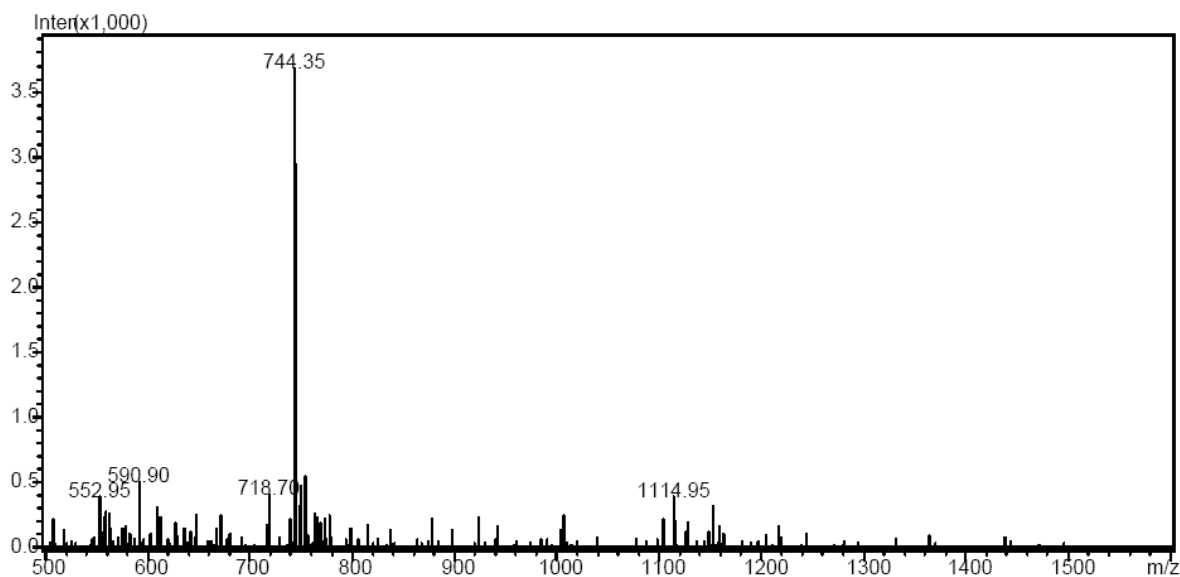

Figure 6 ESMS <sup>nat</sup>Cu-LS172

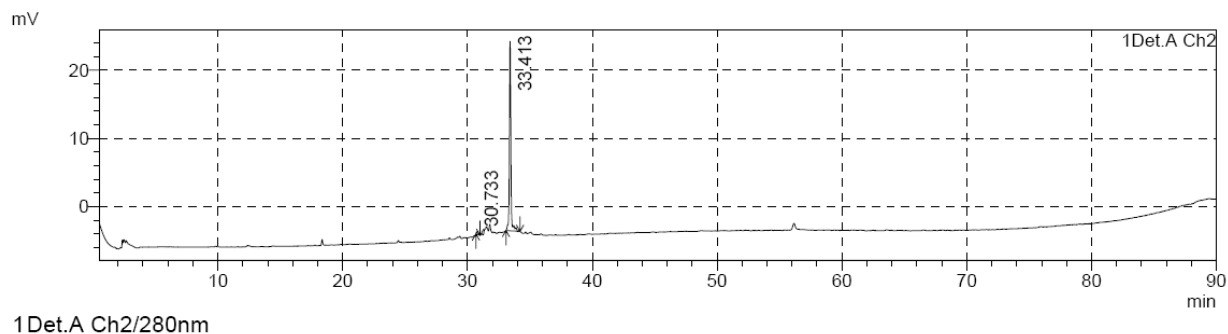

PeakTable

UV-Vis detector Ch2 280nm

| Peak# | Ret. Time | Area   | Height | Area %  | Height % |
|-------|-----------|--------|--------|---------|----------|
| 1     | 30.733    | 3462   | 348    | 1.500   | 1.241    |
| 2     | 33.413    | 227320 | 27724  | 98.500  | 98.759   |
| Total |           | 230781 | 28073  | 100.000 | 100.000  |

Figure 7 RP-HPLC <sup>nat</sup>Lu-LS172

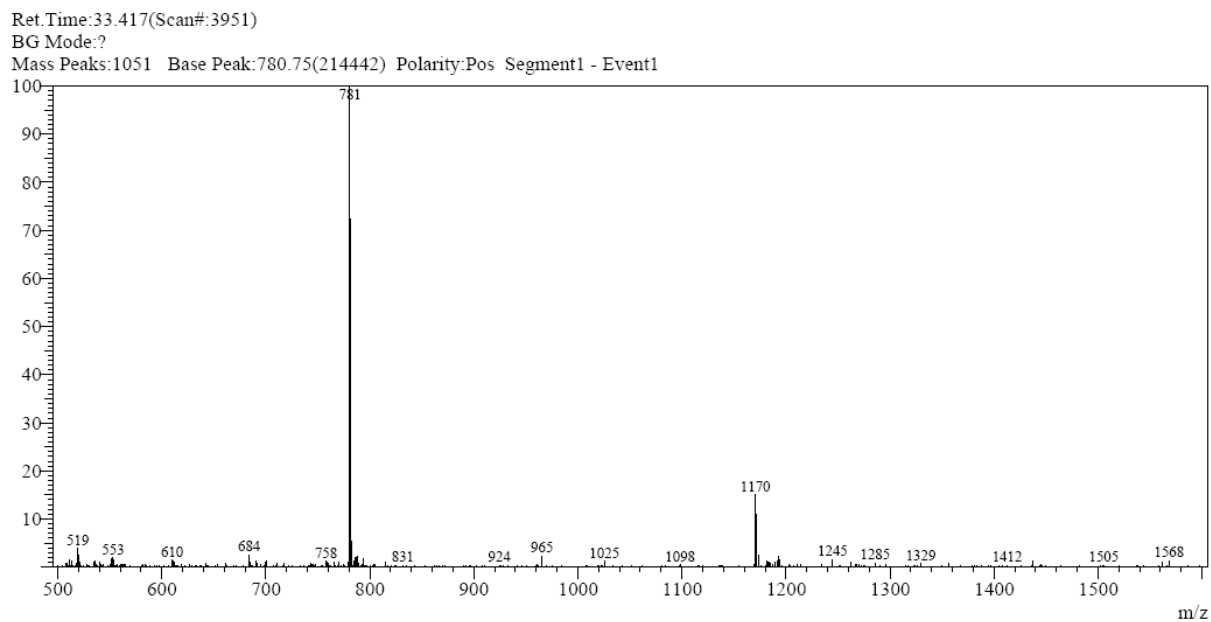

Figure 8 ESMS <sup>nat</sup>Lu-LS172
